1 Crystal structures of taxane-tubulin complexes: Implications for the mechanism of  
2 microtubule stabilization by Taxol

3  
4 Andrea E. Prota<sup>1\*</sup>; Daniel Lucena-Agell<sup>2□</sup>; Yuntao Ma<sup>3□</sup>; Juan Estévez-Gallego<sup>2□</sup>; Carlos  
5 Roca<sup>4</sup>; Fernando Josa-Prado<sup>2</sup>; Kenneth Goossens<sup>2‡</sup>; Juan Francisco Giménez-Abián<sup>2</sup>,  
6 Shuo Li<sup>3</sup>, Ángeles Canales<sup>2,4</sup>; Katja Bargsten<sup>1+</sup>; José Manuel Andreu<sup>2</sup>; Karl-Heinz  
7 Altmann<sup>5</sup>; Natacha Olieric<sup>1</sup>; Shinji Kamimura<sup>6</sup>; Tobias Mühlethaler<sup>1</sup>; María A. Oliva<sup>2</sup>;  
8 Michel O. Steinmetz<sup>1,7</sup>; Wei-Shuo Fang<sup>3\*</sup>; J. Fernando Díaz<sup>2\*</sup>.

9 <sup>1</sup>Laboratory of Biomolecular Research, Division of Biology and Chemistry, Paul Scherrer  
10 Institut, CH-5232 Villigen, Switzerland

11 <sup>2</sup>Centro de Investigaciones Biológicas Margarita Salas, Consejo Superior de  
12 Investigaciones Científicas, Ramiro de Maeztu 9, 28040 Madrid, Spain

13 <sup>3</sup>State Key Laboratory of Bioactive Substances and Functions of Natural Medicines,  
14 Institute of Materia Medica, Chinese Academy of Medical Sciences & Peking Union  
15 Medical College, 2A Nan Wei Road, Beijing 100050, China

16 <sup>4</sup>Department of Organic Chemistry, Faculty of Chemistry, Universidad Complutense de  
17 Madrid. Av. Complutense, s/n, 28040 Madrid

18 <sup>5</sup>Department of Chemistry and Applied Biosciences, Institute of Pharmaceutical  
19 Sciences, ETH, Zürich, Vladimir-Prelog Weg 4, HCI H405, CH-8093 Zürich,  
20 Switzerland

21 <sup>6</sup>Department of Biological Sciences, Faculty of Science and Engineering, Chuo  
22 University, Kasuga, Bunkyo, Tokyo, Japan

23 <sup>7</sup>University of Basel, Biozentrum, 4056 Basel, Switzerland

24 <sup>‡</sup>Current address: Department of Pharmaceutical Sciences, Laboratory of Medicinal  
25 Chemistry, University of Antwerp, Universiteitsplein 1, 2610 Wilrijk, Belgium.

26 <sup>+</sup>Current address: leadXpro AG, PARK innovAARE, CH-5234 Villigen, Switzerland

27 <sup>□</sup>These authors have equally contributed to this work.

28 \*Corresponding Authors. [andrea.prota@psi.ch](mailto:andrea.prota@psi.ch); [wfang@imm.ac.cn](mailto:wfang@imm.ac.cn); [fer@cib.csic.es](mailto:fer@cib.csic.es)  
29  
30  
31  
32

33 **Abstract**

34 Paclitaxel (Taxol<sup>®</sup>) is a first-line chemotherapeutic drug that promotes the  
35 curved-to-straight conformational transition of tubulin, an activation step that is necessary  
36 for microtubule formation. Crystallization of Taxol bound to tubulin has been long  
37 elusive. We found that baccatin III, the core structure of paclitaxel which lacks the C13  
38 side chain, readily co-crystallizes with curved tubulin. Tailor-made taxanes with  
39 alternative side chains also co-crystallized, allowing us to investigate their binding  
40 modes. Interestingly, these Taxol derived compounds lost their microtubule stabilizing  
41 activity and cytotoxicity but kept their full microtubule binding affinity, and all induced  
42 lattice expansion upon binding. Additional nuclear magnetic resonance studies propose  
43 that Taxol binds to a small fraction of straight tubulin present in solution. Our results  
44 suggest a mode of action of Taxol, where the core structure is responsible for the  
45 interacting energy while the bulky hydrophobic C13 side chain enables binding  
46 selectively to straight tubulin and promotes stabilization.

47  
48  
49



## 50 Introduction

51 Taxanes are the main choice among other chemotherapeutic agents for the  
52 treatment of several solid tumors such as ovarian, lung and breast cancer, as well as  
53 advanced Kaposi's sarcoma(1). The three active taxanes in clinical use, paclitaxel  
54 (Taxol<sup>®</sup>; Ptx), docetaxel (Taxotere<sup>®</sup>; Dcx) and cabazitaxel (Jevtana<sup>®</sup>), are part of a big  
55 family of chemically diverse compounds that bind to the taxane site of the  $\alpha\beta$ -tubulin  
56 heterodimer(2) (**Fig. 1A**). This family of compounds also includes other non-taxane  
57 molecules and a wide range of analogs derived thereof. Because taxane-site targeting  
58 compounds promote tubulin assembly into microtubules (MTs)(3), they are called MT-  
59 stabilizing agents (MSAs). From the thermodynamic point of view, taxane-site MSAs  
60 contribute to MT assembly by their preferred binding to them(4). Tubulin displays two  
61 known conformations, related to its assembly state: a straight conformation (s-tubulin)  
62 present in MTs and zinc-induced sheets(5, 6), and a curved conformation (c-tubulin)  
63 observed in unassembled tubulin, which is non-related to the nucleotide bound to the  
64 regulatory site of  $\beta$ -tubulin (GTP or GDP)(7, 8). The curved-to-straight conformational  
65 transition is required for MT-assembly. Current hypotheses(9-11) establish that the  
66 activation of tubulin for assembly could be accomplished by different pathways and each  
67 MSA could favor a specific one, depending on its structure and its interaction pattern with  
68 unassembled, c-tubulin. Structural studies of taxane-site agents(10, 12) bound to MTs or  
69 unassembled tubulin have shed light on the binding mode to s- and c-tubulin tubulin,  
70 respectively. Nevertheless, their underlying mechanisms of action are still a matter of  
71 debate. On one hand, zampanolide and epothilone induce the complete restructuring of  
72 the  $\beta$ M-loop in unassembled, c-tubulin (**Fig. 1B**), which is a key secondary structural  
73 element required for the stabilization of lateral contacts between protofilaments (PF)  
74 within the MT(12). These compounds mainly connect the base of the  $\beta$ M-loop with both  
75 the N-terminal domain helix  $\beta$ H6 and the central helix  $\beta$ H7 (**Fig. 1B**), similarly to  
76 dictyostatins and discodermolides(9, 13). However, neither dictyostatins nor  
77 discodermolides fold the  $\beta$ M-loop into a helix, which suggests a different mechanism.  
78 The interaction of Ptx with MTs affects the longitudinal tubulin interface along  
79 protofilaments (PFs), increasing the axial repeat of tubulin dimers (i.e., causing a lattice  
80 expansion)(10). The stabilizing effect promoted in assembled, s-tubulin involves subtle  
81 movements in the N-terminal domain helix  $\beta$ H1, the central helix  $\beta$ H7 and the  
82 intermediate domain loop  $\beta$ S9- $\beta$ S10 (**Fig. 1B**)(10). However, the molecular details of

83 how Ptx favors these movements and promotes MT assembly and stabilization are  
84 unknown yet.

85 Ptx is one of the drugs in the World Health Organization's List of Essential  
86 Medicines, but the appearance of side effects (e.g., neurotoxicity) compromises  
87 chemotherapy cycles during cancer treatment. Understanding the underlying mechanism  
88 of MT stabilization by taxanes is highly required to lay the groundwork for future and  
89 safer drugs. To date, all efforts to obtain high-resolution crystal structures and hence,  
90 detailed information on the Ptx, Dcx or cabazitaxel interacting network within the taxane-  
91 site have been unsuccessful(7, 8, 14). Here, we have taken a multidisciplinary approach  
92 to unveil how Ptx recognizes the taxane site and stabilizes MTs. From the Ptx core  
93 structure (baccatin III) to specifically tailored Ptx derivatives with alternative engineered  
94 C13 tails, we have combined macromolecular crystallographic high-resolution structures  
95 with biochemical, cell biology, nuclear magnetic resonance (NMR) and X-ray fiber  
96 diffraction studies to explain how clinically used taxanes induce MT assembly from  $\alpha$ -  
97 tubulin and how they stabilize MTs.

98

99

## 100 **Results**

101 *The bulky group at ring A position of the C13 side chain precludes binding to curved*  
102 *conformation and is essential for activity.*

103 To determine the high-resolution structure of a taxane bound to tubulin we  
104 performed both soaking and co-crystallization experiments using the previously  
105 described crystal system consisting of a protein complex composed of two  $\alpha\beta$ -tubulin  
106 heterodimers, the stathmin-like protein RB3 and the tubulin tyrosine ligase (termed T<sub>2</sub>R-  
107 TTL)(12, 14) as well as with the DARPin D1-tubulin crystal system (TD1)(8). Upon  
108 failure with a first series of tested taxanes comprising Ptx, Dcx, the more soluble  
109 3'-N-aminopaclitaxel (N-AB-PT, **Fig. 1C**)(15) and the engineered high affinity taxanes  
110 Chitax 40(16) and Chitax 68(17) (**Fig. 1C**), we approached the challenge from a different  
111 angle. We started with baccatin III, a precursor in the biosynthesis of Ptx that contains  
112 both the C2-benzoyloxy ring C and the C10 acetate ester, but lacks the C13 side chain  
113 with both the 3'-N-benzamido phenyl ring A and the 3'-phenyl ring B moieties(18).

114 Baccatin III (**Fig. 1C**) is reported to be biologically inactive(19-21) despite of  
115 having  $\mu$ M affinity for MTs(22) (ref. 22 describes a weak *in cell* activity as well). It is

116 known that taxanes bind with high affinity to assembled s-tubulin(23) while having  
117 undetectable affinity for unassembled c-tubulin(4). We found that baccatin III shows a  
118 detectable affinity ( $K_{b_{25^{\circ}C}} 3.0 \pm 0.5 \times 10^3 \text{ M}^{-1}$ ) to unassembled c-tubulin (**Fig. 3C**), in the  
119 same range as the ones previously measured for other compounds able to bind and co-  
120 crystallize with tubulin, such as epothilone A  $0.8 \pm 0.3 \times 10^4 \text{ M}^{-1}$  (24) and discodermolide  
121  $2.0 \pm 0.7 \times 10^4 \text{ M}^{-1}$  (25). Therefore, we hypothesized that the presence of the C13 side chain  
122 of the taxanes aforementioned might preclude the binding to the c-tubulin form present  
123 in both the T<sub>2</sub>R-TTL and the TD1 complexes. Subsequently, we obtained a T<sub>2</sub>R-TTL-  
124 baccatin III complex structure at 1.9Å resolution (**Fig. 2A, Fig. S1A & D, Table S1**)  
125 (PDB ID 7A7I) and found that baccatin III binds to the taxane site with its C2-benzoyloxy  
126 ring C stacked between the side chains of βH229 and βL275 in the leucine rich pocket  
127 formed by the side chains of βC213, βL217, βL219, βD226, βH229, βL230 and βL275.  
128 Its carbonyl oxygen forms a weak hydrogen bond to the main chain amide of βR278 (**Fig.**  
129 **2A**). The C10 acetate is exposed to the solvent and together with the C12 methyl is in  
130 Van der Waals distance to βG370 of the βS9-βS10 loop. Furthermore, the oxetane oxygen  
131 and the C13 hydroxyl form hydrogen bonds to the main chain amide of βT276 and to  
132 βH229 NE2, respectively. The C4 acetate is buried in the hydrophobic pocket formed by  
133 βL230, βA233, βF272, βP274, βL275, βM302, βL371 and the aliphatic portion of the  
134 βR369 side chain. Strikingly, we only found well-defined electron density for the amino-  
135 terminal section of the βM-loop up to βR278, while the remaining portion of the βM-  
136 loop was disordered. This suggests that baccatin III does not promote the stabilization of  
137 this region into a helical conformation, in contrast to what has been previously observed  
138 for both the taxane-site binders zampanolide and epothilone A(12).

139 Aiming to understand the implication of Ptx's C13 ring A moiety (or its equivalent  
140 tert-butyl in Dcx) on tubulin activation and to understand why it precludes binding to c-  
141 tubulin, we took a synthetic effort to obtain new taxane ligands with modified side chains  
142 able to crystallize in complex with c-tubulin. We produced a series of modified taxanes  
143 bearing smaller groups at the ring A position of Ptx: acrylamide (**2a**), haloacetamide (**2b**,  
144 **2c**) and isocyanate (**2d**) (**Fig 1C**). Since we measured binding affinity of **2a** to  
145 unassembled tubulin dimers ( $K_{b_{25^{\circ}C}} 0.8 \pm 0.3 \times 10^3 \text{ M}^{-1}$ ) (**Fig. 3C**), but not of N-AB-PT(15),  
146 Chitax 40(16) or Chitax 68(17), we concluded that the new modification applied to the  
147 Ptx structure increases the binding of the compounds for the unassembled c-tubulin. In  
148 fact, we unequivocally found difference electron densities at the taxane sites of T<sub>2</sub>R-TTL

149 crystals soaked with **2a** (**Fig S1B, E**) (PDB ID 7A7F) and **2b** (**Fig S1C, F**) (PDB ID  
150 7A7J). The corresponding structures were refined to 1.95 Å and 2.35 Å resolution,  
151 respectively. Although these densities displayed continuity between the 3'-N moieties of  
152 these ligands and the side chain of  $\beta$ H229, covalent adduct formation was discarded both  
153 biochemically (**see extended data**) and crystallographically with the help of anomalous  
154 data collected from a T<sub>2</sub>R-TTL-**2b** crystal at the bromine peak wavelength (0.91501 Å,  
155 **Fig S1G**).

156 The structure showed that compound **2a** forms comparable interactions with both  
157 the C2-benzoyloxy ring C and the oxetane moieties as described for baccatin III (**Fig.**  
158 **2B,C**). However, the core ring is tilted towards helix  $\beta$ H6 and strand  $\beta$ S7 by 18.5° (angle  
159 between the two C1-C9 axis;  $\text{rmsd}_{\text{bacIII-2a}}$  of 0.794 Å for 39 core atoms), adopting a pose  
160 that is closer to that observed for Ptx bound to s-tubulin (PDB ID 6WVR;  $\text{rmsd}_{\text{2a-Ptx}}$  of  
161 0.845 Å for 56 core atoms **Fig. 4B**;  $\text{rmsd}_{\text{bacIII-Ptx}}$  of 1.048 Å for 42 core atoms **Fig. 4B**).  
162 Similar to Ptx bound to s-tubulin, the C39 carbonyl of the C13-3'-N-acrylamide moiety  
163 of **2a** forms an equivalent hydrogen bond to the NE2 of  $\beta$ H229 (**Fig. 2B, 4B**). The  
164 acetamide moiety is exposed to the solvent and forms water-mediated hydrogen bonds to  
165 the side chains of  $\beta$ E22 and  $\beta$ R369, a space that is otherwise occupied by water molecules  
166 in the baccatin III structure. In the context of Ptx-bound MTs the 3'-N-benzamido phenyl  
167 ring A moiety of Ptx occupies this space and the  $\beta$ D26 side chain replaces the  $\beta$ R369 side  
168 chain, which adopts a flipped-out conformation (PDB ID 6WVR, **Fig. 2B, Fig. 4B**). The  
169 absence of the C10 acetate in **2a** compared to baccatin III has no impact on the  
170 orientations and conformations of both the  $\beta$ S9- $\beta$ S10 and the  $\beta$ M-loops, which are  
171 closely similar in both structures (**Fig. 2C**). In both structures, we found the  $\beta$ T5-loops in  
172 the “out” conformation.

173 Interestingly, we found that the replacement of ring A by an acrylamide moiety  
174 has a deep impact in the compound's activity showing a four orders of magnitude lower  
175 cytotoxicity than Ptx in KB and HeLa tumoral cells (**Table 1**). Biochemically **2a** and **2b**  
176 behaved as weaker assembly inducers compared to Ptx (PEDTA buffer, **Fig. 3AB**).  
177 Because both the tubulin assembly induction power and the cytotoxicity of MT stabilizing  
178 agents is strongly linked to the binding affinity for MTs(13, 23, 26) we expected a  
179 strongly compromised ability to bind MTs for **2a** and **2b**. Surprisingly, that was not the  
180 case and the binding constants of **2a** ( $0.46 \pm 0.06 \times 10^7 \text{ M}^{-1}$ ) and **2b** ( $0.32 \pm 0.03 \times 10^7 \text{ M}^{-1}$ )  
181 to MTs were similar to the one observed for Ptx ( $1.43 \pm 0.17 \times 10^7 \text{ M}^{-1}$  (23)). Furthermore,

182 also baccatin III (inactive compound) displayed a significant binding affinity for  
183 assembled MTs  $1.5 \times 10^5 \text{M}^{-1}$  (22), which is even higher than that of other taxanes with  
184 detectable activity(16). Therefore, we concluded that the increase of binding affinity for  
185 the curved conformation (and the subsequently reduction of the preferential binding for  
186 the straight one) could be linked to decreased MT stabilizing activity and cytotoxicity.

187

188 *Ptx binds to the straight conformation of unassembled tubulin in solution.*

189 To obtain information about the transient Ptx/unassembled tubulin interactions in  
190 solution we approached TR-NOESY experiments. Surprisingly, despite both the low  
191 solubility of Ptx and the reported very low binding constant of Ptx to unassembled,  
192 c-tubulin ( $< 10^3 \text{M}^{-1}$ )(4), we found weak but clear signals in the spectra (**Fig. 5C**). In the  
193 presence of MTs, the spectra displayed strong signals (**Fig. 5D**), as expected(25). As a  
194 control we acquired the NOESY spectrum of Ptx in the absence of tubulin, no peaks were  
195 detected (not shown) indicating that all the signals observed in the presence of tubulin are  
196 TR-NOESY ones. Strikingly, the correlation between both spectra was almost perfect  
197 (the observed displacement in the position of the cross peaks is due to the different  
198 temperature at which the spectra were recorded 298 K for unassembled tubulin vs 310 K  
199 for MTs), suggesting that the conformation of Ptx was similar when bound to  
200 unassembled, c-tubulin ( $K_b < 10^3 \text{M}^{-1}$ ) or assembled s-tubulin ( $K_b 10^7 \text{M}^{-1}$ )(23). Instead,  
201 previous studies with epothilone and discodermolide revealed differences on the bound  
202 conformation depending on the tubulin assembly state(24, 25). The quantitative analysis  
203 of the TR-NOESY spectra (Table S2), indicates that the conformation adopted by Ptx in  
204 solution (**Fig. 5A**) is nearly coincident with this determined by cryo-EM. Considering  
205 that Ptx binding to unassembled, c-tubulin is not detected either by biochemical methods  
206 nor by macromolecular crystallography, we assumed that the equal conformation of Ptx  
207 bound to assembled and unassembled tubulin could be attributed to the observation of  
208 Ptx bound to a small fraction of s-tubulin (**see discussion and extended discussion**).

209 To further characterize the ligand binding epitope and to probe the pharmacophore  
210 region of Ptx bound to tubulin, we acquired STD-NMR spectra of tubulin preparations  
211 obtained under unassembled and assembled conditions. Similar to what has been  
212 described for Dcx(25), we found STD signals under both studied conditions (assembled  
213 and unassembled tubulin with very similar profiles (**Fig. S3**), denoting a similar binding  
214 mode of Ptx under both conditions. However, experiments performed with **2a** under

215 unassembled and assembled tubulin conditions (**Fig. S4**) showed subtle differences in the  
216 C13 side chain section corresponding to the acrylamide moiety that replaces the aromatic  
217 ring A in Ptx, thereby suggesting two distinct interaction patterns of this moiety  
218 depending on the tubulin conformation. Additionally, similar STD profiles of baccatin III  
219 bound to unassembled and assembled tubulin (**Fig. S5**) were found, as expected, because  
220 this compound lacks the C13 side chain responsible for the differential interaction for c-  
221 and s-tubulin. Together, these results support that the weak signals of Ptx bound to  
222 unassembled tubulin arise from the compound bound to the small proportion of  
223 unassembled s-tubulin in equilibrium with c-tubulin.

224

225 *C13 side chain promoted perturbations in unassembled c-tubulin, strengthen on straight*  
226 *MTs.*

227 To understand the contribution of the C13 side chain to the observed differences  
228 in biochemical and biological activity and in the NMR-experiments, we further  
229 investigated the perturbations induced by binding of baccatin III and **2a** to the  
230 unassembled c-tubulin  $\beta$  chains. To this aim, we first superimposed the structures of apo  
231 (PDB ID 4I55), baccatin III and **2a** bound states onto the N-terminal  $\beta$ -sheets of  $\beta$ -tubulin  
232 (residues 3-9, 63-66, 132-138, 163-169 and 198-202; rmsdBacIII 0.08 Å of 29 C $\alpha$ ; rmsd<sub>2a</sub>  
233 0.10 Å of 29 C $\alpha$ ) and calculated the rmsd-differences between both the apo and the taxane  
234 bound states using the rmsdByRes function in PyMOL (**Fig. 6B, D**). The rmsd-  
235 differences were also plotted and mapped onto the corresponding structures to highlight  
236 the major regions of perturbation (**Fig. 6A, C**). Comparable perturbations were observed  
237 for backbone and all atoms in the helix  $\beta$ H2', the  $\beta$ T5-loop, the  $\beta$ M-loop basis, the helix  
238  $\beta$ H9, and both the helix  $\beta$ H11- $\beta$ H11' and  $\beta$ H12 regions of both the ligands, while the  
239 rmsd-values for both the  $\beta$ S2'- $\beta$ S2'' and the  $\beta$ S9- $\beta$ S10 loops were higher for **2a**. To  
240 investigate the effect of the observed perturbations on the relative domain arrangements  
241 in  $\beta$ -tubulin of the individual complexes, we further superimposed the  $\beta$ -tubulin chains  
242 onto their central helices  $\beta$ H7. For baccatin III, a mild relative twist between the N-  
243 terminal and the intermediate domains was observed (**Fig. S2; Suppl. Movie M1, M2**),  
244 while binding of **2a** rather caused both the N-terminal and intermediate domains of the  
245  $\beta$ -tubulin molecule to slightly move apart (**Fig. S2; Suppl. Movie M3, M4**).



246           Since these subtle movements were observed in the c-tubulin conformations in the  
247 context of a crystal lattice, we sought to compare them to the perturbations that occur  
248 upon Ptx binding in the context of MTs. To this aim, we performed the same type of  
249 analysis by superimposing the N-terminal  $\beta$ -sheets of  $\beta$ -tubulin from the cryo-EM  
250 reconstruction of Ptx-bound GDP-MTs (PDB ID 6WVR)(27) onto the corresponding  
251 domains of the undecorated apo GDP-MT structure (PDB ID 6DPV; rmsd 0.304 Å 30  
252  $C_{\alpha}$ )(28). The rmsd-analysis of Ptx bound MTs revealed comparable but more pronounced  
253 perturbations to the ones observed for **2a** for the  $\beta$ S2'-S2'', the  $\beta$ H3, the  $\beta$ S9- $\beta$ S10 and  
254 the  $\beta$ H11- $\beta$ H12 regions, with a more prominent effect on the  $\beta$ M-loop (**Fig. 4C, D**).  
255 These observations suggested that perturbations induced by the C13 side chain may have  
256 an impact on stabilizing the MT-lattice, since they occur at positions that contribute to  
257 lateral contacts in MTs, which is in agreement with the results published by Debs and  
258 co-workers(27), where Ptx-bound MTs displayed higher curvature and distinct  $\beta$ M-loop  
259 movements.

260

261 *C13 side chain is not required for lattice expansion but affects lateral contacts in MTs.*

262           The main structural effect of Ptx on the MT lattice is a longitudinal expansion that  
263 have been related to the stabilization effect of this compound(29, 30). We have previously  
264 validated X-ray fiber diffraction of shear-flow aligned MTs as an accurate technique to  
265 discern main MT lattice structural features(31, 32) and, we used it to elucidate how our  
266 Ptx derivatives with reduced activities affect the structure of MTs.

267           The meridional diffraction patterns are related to axial helical repetitions on the  
268 MT lattice and show a layer line at 4 nm (**Fig. 7**) and, when the lattice is expanded, a  
269 second weaker layer line at 8 nm due to the length differences between  $\alpha$ - and  
270  $\beta$ - tubulin(31). Additionally, the position of the 1 nm layer line (4<sup>th</sup> harmonic of the 4 nm  
271 layer line) also moves towards the center of the image when lattice expansion occurs.  
272 Both, Ptx (**Fig. 7A**) and Dcx (**Fig. 7B**) induced MTs expansion, as expected(29). And this  
273 expansion occurred in either case, when the addition of the drug was previous to assembly  
274 into MT using GTP-bound or GDP-bound tubulin (named “pre-“ in **Table S3**) or when  
275 added directly to assembled MTs (named “post-“ in **Table S3**). This was in clear  
276 opposition to previous observations in which expansion was only observed in  
277 pre-addition experiments(10). Interestingly, **2a** (**Fig. 7C**), **2b** (**Fig. 7D**) and baccatin III

278 (Fig. 7E) showed similar MT expanded lattices indicating that the lattice expansion is not  
279 related with taxane's MT stabilizing activity. Note that the diffraction patterns of MTs  
280 stabilized with **2a** or **2b** showed a diffuse 1 nm layer line showing variations on the  
281 monomer rise, which is in clear contrast to all other analyzed taxanes that displayed a  
282 sharp band (i.e., a fixed monomer rise). Furthermore, we found that the effect of these  
283 compounds on the lateral interactions (equatorial diffraction patterns) differed and,  
284 thereby variations in the C13 side chain might modulate the lateral interactions between  
285 PFs (Table S3).

286

287

## 288 Discussion

289 Previous studies of MT stabilization by Ptx controversially discussed the  
290 interaction of the drug with the  $\beta$ M-loop and lattice effects, through lateral versus  
291 longitudinal contacts(10, 29, 33) and communication between  $\beta$ -tubulin domains through  
292 core helix  $\beta$ H7(34). Here, we undertook a unifying approach to discern which parts of  
293 the Ptx molecule are involved in protein recognition, in inducing conformational changes  
294 on tubulin and MT and, in its final stabilization activity. We have studied and compared  
295 the structural effects as well as the biochemical and cellular activity of the Ptx core region,  
296 baccatin III, and of two engineered Ptx derivatives, **2a** and **2b**, with modifications at the  
297 C13 side tail affecting ring A. We have gained insight into our understanding of the  
298 molecular mechanism of action of Ptx finding that: (i) the taxane core (baccatin III) is  
299 responsible for most of the interacting energy of Ptx but it is only marginally involved in  
300 the stabilization activity, (ii) the bulky hydrophobic group at 3'-N of the C13 side tail  
301 distinguishes the s- from the c-tubulin conformation and promotes stabilization, and, (iii)  
302 the lattice expansion is unrelated to the MT stabilization mechanism of Ptx.

303 The high-resolution crystallographic data show that the taxane core region reduces  
304 the flexibility of the M-loop by inducing a partial structuring of its N-terminal section.  
305 Further changes occur in the presence of a C13 side chain (**2a** and **2b**), tilting the  
306 positioning of the Ptx core region by 18.5° within the pocket, and inducing a subtle  
307 reorientation of the tubulin domains. Therefore, tubulin conformational changes related  
308 to the binding of taxanes are initiated when bound to c-tubulin (in solution or at the tip of  
309 MTs(35)) and strengthen upon tubulin straightening through the formation of polymer  
310 contacts. Despite we have not observed a complete folding of the  $\beta$ M-loop upon baccatin



311 III, **2a** and **2b** binding, perturbations were detected in the c-tubulin structures, which were  
312 comparable but weaker to the ones observed upon Ptx-binding to assembled MTs.  
313 Moreover, fiber diffraction studies showed differences on the lateral arrangement of  
314 shear-flow aligned MTs bound to these compounds. This suggests that Ptx and Ptx-  
315 derived compounds indeed lock the lateral contacts to promote MT lattice stability  
316 through interactions with the N-terminal section of the  $\beta$ M-loop, which is in agreement  
317 with both the observations reported by Manka and Moores(33) and by Debs and co-  
318 workers(27). Interestingly, fiber diffraction studies also showed the same MT-lattice  
319 expansion for these analogs as the one observed in the presence of the active compounds  
320 Ptx and Dcx. This structural feature is not related to the stabilization power since all  
321 taxanes and Ptx-derived compounds similarly induced MT axial expansion but their  
322 stabilization power ranged from highly stabilized MTs (Ptx and Dcx) to lower (**2a**) or  
323 none or very weak (bacattin III). Therefore, the axial effect of these taxanes and hence,  
324 the longitudinal contacts might not be the main reason of the stabilizing activity and this  
325 activity may rely more on the effect of these compounds on the lateral interactions.

326 Importantly, the Ptx structure is optimized for its activity and changes introduced  
327 at the ring A of the C13 side chain severely hamper the MT stabilizing activity. These  
328 changes did not affect the binding to s-tubulin in MTs since the binding modes of **2a** and  
329 **2b** were very similar to the ones described for Ptx-bound to MTs(10, 29, 33) (**Fig. S6**),  
330 but significantly enhanced the interaction with unassembled c-tubulin. The curved-to-  
331 straight conformational change in tubulin induces subtle modifications at the taxane-site  
332 that were also previously detected by changes of the STD profiles of other taxane site  
333 binders (discodermolide and epothilones)(24, 25). In contrast, no changes in the STD  
334 profiles were detected for Ptx samples. Moreover, TR-NOESY determined, Ptx-bound  
335 conformations in unassembled tubulin and MTs were identical (**Figs 5; S3; S4; S5**)  
336 (detailed information about the conformational studies are given in supporting  
337 information, including the quantitative analysis of the NOE intensities by taking into  
338 account the full matrix relaxation treatment implemented in MSpin software(36)). We  
339 hypothesize that very likely we are detecting the binding of Ptx to a small fraction of  
340 unassembled, s-tubulin. This binding event would shift the equilibrium towards the  
341 straight conformation due to the higher affinity (**Fig. 8, extended discussion**) and hence,  
342 Ptx-bound unassembled s-tubulin would easily nucleate and would be more prone to  
343 assembly because the energy needed for the curved-to-straight transition is provided by

344 Ptx binding (**extended discussion**). Furthermore, these nucleated, straight oligomers  
345 (previously observed in(37)) would be less prone to disassembly. In the case of assembled  
346 MTs, the effect of the preferential binding implies that drug-bound subunits would be  
347 restricted to bend (bending would require release of the tightly bound drug), therefore  
348 preserving the stabilizing contacts. Concordantly, compounds with higher differential  
349 affinity between c- vs s-tubulin conformations (Ptx and Dcx) are better assembly inducers  
350 and more cytotoxic than those with lower difference of affinities (Ptx derivatives of this  
351 work) (**Fig. 3** and **Table 1**), supporting a link between preferential binding for the s-  
352 tubulin conformation and the stabilizing activity.

353 We have seen that several secondary structural elements are perturbed upon Ptx  
354 derivative binding. Moreover, we observed a major structural difference in proximity of  
355 the position occupied by the 3'-N-benzamido phenyl ring A moiety of Ptx in MTs: In the  
356 c-tubulin-**2a** structure, the  $\beta$ R369 side chain occupies the same space as the  $\beta$ D26 side  
357 chain in the context of the s-tubulin conformation in MTs. These changes could explain  
358 the observed differences of binding affinity for the unassembled and the assembled  
359 tubulin structures. The C13 side chain is involved in the interaction with helix  $\beta$ H1, which  
360 is flanked by the  $\beta$ H1- $\beta$ S2 loop (the lock in the key-lock lateral interplay with the  $\beta$ M-  
361 loop). Upon transition to the assembled s-tubulin state, this space is narrowed down by  
362 the side chains of  $\beta$ D26,  $\beta$ K19,  $\beta$ E22 and  $\beta$ H229 to form a favorable environment for the  
363 interaction with the ring A moiety, which may lock the Ptx-bound tubulin in the straight  
364 conformation (**Fig. 9B**). In the absence of the C13 side chain (baccatin III) or in the  
365 presence of the less bulky moieties in ring A position (**2a** and **2b**), ligand binding is likely  
366 less affected by the conformational transition from curved to straight, since much looser  
367 interactions can still be established to the charged residue side chains of the  $\beta$ S9- $\beta$ S10  
368 loop and the helix H1 through water molecules (**Fig. 2C**, **Fig. 9A**). However, they may  
369 not be strong enough to lock the tubulin in the straight conformation. These observations  
370 suggest that modifications of the C13 side chain greatly affect the differential binding  
371 affinity of Ptx derived taxanes for unassembled c- vs. assembled s-tubulin in MTs.

372 In summary, our results support the essential role of the ring A in C13 side chain  
373 of Ptx in the mechanisms of MT stabilization. The presence of the ring A in the side chain  
374 precludes binding to c-tubulin and contributes to the consolidation of lateral contacts over  
375 the axial ones.

376

## 377 **Materials and Methods**

### 378 *Proteins and ligands*

379 Purified calf brain tubulin and chemicals were obtained as previously described(4,  
380 38). Paclitaxel (Taxol<sup>®</sup>) (Ptx) was from Alfa Aesar Chemical, Docetaxel (Taxotere<sup>®</sup>)  
381 (Dcx) was kindly provided by Rhône Poulenc Rorer, Aventis (Schiltigheim, France),  
382 baccatin III was from Sigma, Flutax-2, Chitax 40, 3'-N-aminopaclitaxel (N-AB-PT) and  
383 Chitax-68 were synthesized as described(15-17, 39). All compounds were diluted in  
384 99.8% D6-DMSO (Merck) to a final concentration of 20 mM and stored at -20 °C. Their  
385 solubility in aqueous media was determined as described in(40), Flutax-2 was found  
386 soluble, while a 100 µM solubility was found for docetaxel and a 50 µM for both  
387 paclitaxel and Chitax40.

388

### 389 *Biochemistry and cell biology*

390 HeLa S3 and HeLa βIII(41) cells were cultured in Dulbecco Modified Eagle  
391 Medium (DMEM) supplemented with 10% fetal calf serum (FCS), glutamine (2 mM),  
392 gentamycin (40 µg/mL), penicillin (100 IU/mL), and streptomycin (100 µg/mL). The  
393 medium for HeLa βIII cells was additionally supplemented with geneticin (0.5 mg/mL).  
394 KB-3-1 (HeLa cells) derived from a cervical carcinoma and its multidrug resistant  
395 counterpart KB-V1 (42) were grown in DMEM, 10% FCS, 1 mM piruvate and penicillin  
396 (50 IU/mL) streptomycin (50 mg/mL), the latter cell line with 1 mg/mL of vinblastine.  
397 Compounds were screened for toxicity against HeLa cells (KB-3-1, KB-V1, HeLa S3 and  
398 HeLa βIII) using MTT assay following previously described protocols with minor  
399 modifications(43). Briefly, cells were seeded in 96-well plates using regular DMEM  
400 medium and incubated for 24 h. Then, cells were treated with vehicle or compound  
401 diluted in the DMEM medium without serum for 72 h. The vehicle and compound  
402 solution was changed once every 24 h. MTT solution (5 mg/ml) was added into each well  
403 and further incubated for another 2 h. Finally, DMSO was added to stop the MTT reaction  
404 and then, optical density was measured at 570 nm using a Molecular Devices SpectraMax  
405 M5 (Molecular Devices, USA). The statistical significance of differences in IC<sub>50</sub> values  
406 were evaluated using the t-test option implemented in the Sigma Plot 13 software package  
407 (version 13, Systat Software, Inc., San Jose, CA, USA).

408 Polymerization of 20  $\mu\text{M}$  Tubulin in PEDTA buffer (10 mM sodium phosphate  
409 (NaPi), 1 mM EDTA, 1 mM GTP, pH 6.7) plus 4 or 7 mM  $\text{MgCl}_2$ , was monitored in the  
410 presence of 25  $\mu\text{M}$  taxanes by turbidity at 350 nm employing a Thermo Appliskan plate  
411 reader (Thermo Fisher, Waltham, MA, USA). The binding constants of the compounds  
412 to the taxane binding site of stabilized cross-linked microtubules (MTs) were measured  
413 by Flutax-2 displacement as previously described(23).

414 The binding constants of both **2a** and baccatin III to unassembled dimeric tubulin  
415 were measured by centrifugation. Increasing amounts of dimeric tubulin (up to 150  $\mu\text{M}$ )  
416 prepared in NaPi-GTP buffer (10 mM sodium phosphate, 0.1 mM GTP, pH 7.0) were  
417 incubated with a fixed concentration (50  $\mu\text{M}$ ) of either baccatin III or **2a**, incubated for  
418 30 min at 25 °C and centrifuged at 100000 rpm in a TLA-100.2 rotor for 2h at 25 °C.  
419 Then, samples were divided into upper (100  $\mu\text{L}$ ) and lower (100  $\mu\text{L}$ ) parts and 100  $\mu\text{L}$  of  
420 NaPi were added to both of them. Afterwards, 10  $\mu\text{M}$  of either docetaxel or paclitaxel  
421 were added as internal standard and samples were subjected three times to an organic  
422 extraction using dichloromethane (v:v). Dichloromethane was removed by evaporation  
423 and samples were resuspended in methanol 70%. Finally, ligand content was analyzed  
424 using an HPLC system (Agilent 1100 Series) and samples were separated using a Zorbax  
425 Eclipse XDB-C18 column (Methanol 70% isocratic condition; 20 minutes runs). Tubulin  
426 content was determined by BCA for each sample. Ligand concentration in the upper 100  
427  $\mu\text{L}$  was considered as free concentration, while this in the lower 100  $\mu\text{L}$  was considered  
428 as the sum of bound and free concentrations. Binding constants of tubulin for the ligand  
429 were calculated assuming a single binding site per tubulin dimer using SIGMAPLOT  
430 14.5 Sigmastat Software Inc.

431 Binding constant of **2a** to cross-linked assembled MTs was measured as  
432 previously described(16).

433 Reactivity of **2a** with tubulin and MTs was studied using organic solvent  
434 extraction and HPLC. Reaction of the compound with MTs was studied by incubating 25  
435  $\mu\text{M}$  of tubulin in 10 mM NaPi, 1mM EDTA, 0.1 mM GTP and 7 mM  $\text{MgCl}_2$  buffer pH  
436 6.7, in the presence of 27.5  $\mu\text{M}$  of **2a** (polymerizing conditions). Duplicated samples were  
437 collected from the reaction tube at 0', 30', 1h, 2h and 4h and were centrifuged at 50000  
438 rpm in a TLA100.2 rotor for 20'. Subsequently, supernatant was collected and a similar  
439 volume of buffer was used to dissolve the pellet. Paclitaxel at 10  $\mu\text{M}$  was added to all the

440 samples as internal standard. Duplicated samples were subjected to organic solvent  
441 extraction either with 3 times of dichloromethane (v:v) or with the milder solvent ethyl  
442 acetate, and the organic solvent was evaporated afterwards. Residues left were  
443 resuspended in 70% methanol/Water and developed isocratically using an Agilent  
444 1100 HPLC system connected to a reverse phase column Zorbax Eclipse XDB-C18  
445 (mobile phase 70% methanol) with detection at 254 and 273 nm to quantify **2a** using the  
446 internal standard.

447 Reaction of **2a** with dimeric tubulin was also studied. 20  $\mu\text{M}$  tubulin in 10 mM  
448 NaPi, 1 mM EDTA, 0.1 mM GTP buffer pH 7.0 (non-polymerizing conditions) was  
449 incubated for 2 hours with 22.5  $\mu\text{M}$  of **2a** at 4°C and 37°C, after incubation 10  $\mu\text{M}$  of  
450 paclitaxel was added to all the samples as internal standard. Samples were further  
451 developed and analyzed as described above. As control, a sample of **2a** in the absence of  
452 tubulin was processed and analyzed in the same way.

453

#### 454 *NMR sample preparation and experiments*

455 Samples of ligand bound to non-polymerized  $\alpha/\beta$ -tubulin -heterodimers were  
456 prepared in 3 mm NMR tubes using a 300  $\mu\text{M}$  concentration of baccatin III or 150  $\mu\text{M}$  of  
457 paclitaxel and 10  $\mu\text{M}$  of tubulin in  $\text{D}_2\text{O}$  (10 mM NaPi, 0.1 mM GTP pD 7.3) as described  
458 in(25). Samples of ligands bound to MTs were prepared in 3 mm NMR tubes using a 150  
459  $\mu\text{M}$  of paclitaxel and 20  $\mu\text{M}$  of tubulin in  $\text{D}_2\text{O}$  (10 mM KPi, 0.1 mM GMPCPP, 6 mM  
460  $\text{MgCl}_2$ , pD 7.0) as described in(25). An 8% DMSO was added to the buffer to solubilize  
461 the ligand. NMR spectra were then recorded at 298 K (dimeric tubulin samples) or 310  
462 K (polymeric tubulin samples) in  $\text{D}_2\text{O}$  on a Bruker AVANCE 500 MHz or on a 700 MHz  
463 spectrometer equipped with a triple-channel cryoprobe as described in(25). Additionally,  
464 the oligomerization state of the tubulin samples for the NMR experiments was analyzed  
465 by sedimentation velocity in a Beckman Optima XL-I analytical ultracentrifuge as  
466 described(25).

467

#### 468 *Crystallization, Data Collection and Structure Determination*

469 Crystals of T<sub>2</sub>R-TTL were generated as described(12, 14). Suitable T<sub>2</sub>R-TTL  
470 crystals were soaked for 8h in reservoir solutions (2-4% PEG 4K, 2-10% glycerol, 30  
471 mM  $\text{MgCl}_2$ , 30 mM  $\text{CaCl}_2$ , 0.1 M MES/Imidazole pH 6.7) containing either 10 mM

472 baccatin III, 5 mM **2a** or **2b**. Subsequently, crystals were flash cooled in liquid nitrogen  
473 following a brief transfer into cryo solutions containing the reservoir supplemented with  
474 16% and 20% glycerol. All data were collected at beamline X06DA at the Swiss Light  
475 Source (Paul Scherrer Institut, Villigen, Switzerland). Images were indexed and  
476 processed using XDS(44). Structure solution using the difference Fourier method and  
477 refinement were performed using PHENIX(45). Model building was carried out  
478 iteratively using the Coot software(46). Data collection and refinement statistics for all  
479 three T<sub>2</sub>R-TTL-complexes are given in Supplemental Table S1. Molecular graphics and  
480 analyses were performed with PyMol (The PyMOL Molecular Graphics System, Version  
481 2.3.2, Schrödinger, LLC). To compare the structures of both baccatin III and **2a**  
482 complexes in the curved tubulin (c-tubulin) conformation to the straight tubulin (s-  
483 tubulin) in paclitaxel stabilized MT (PDB ID 5SYF), all structures were superimposed  
484 onto the taxane-site of **2a** (residues 208-219+225-237+318-320+359-376+272-276+287-  
485 296; rmsd<sub>BacIII</sub> 0.171 Å (48 C<sub>α</sub> atoms), rmsd<sub>5SYF</sub> 0.868 Å (52 C<sub>α</sub> atoms)).

486

#### 487 *MT shear-flow alignment and X-ray fiber diffraction experiments*

488 X-ray fiber diffraction data were collected in BL11-NDC-SWEET beamline of  
489 ALBA Synchrotron at a  $\lambda=0.827$  nm as described in(32). Radial structural parameters  
490 (MT diameter and average inter-PT distances) and dimer/monomer length (from the 4th  
491 harmonic of the first layer-line signals) were determined as described in(32).

492

493

#### 494 **References**

495

- 496 1. M. W. Saville *et al.*, Treatment of HIV-associated Kaposi's sarcoma with  
497 paclitaxel. *The Lancet* **346**, 26-28 (1995).
- 498 2. J. J. Field, J. F. Diaz, J. H. Miller, The Binding Sites of Microtubule-Stabilizing  
499 Agents. *Chemistry & Biology* **20**, 301-315 (2013).
- 500 3. P. B. Schiff, S. B. Horwitz, Taxol assembles tubulin in the absence of exogenous  
501 guanosine 5'-triphosphate or microtubule-associated proteins. *Biochemistry* **20**,  
502 3247-3252 (1981).
- 503 4. J. F. Díaz, M. Menéndez, J. M. Andreu, Thermodynamics of ligand-induced  
504 assembly of tubulin. *Biochemistry* **32**, 10067-10077 (1993).
- 505 5. E. Nogales, S. G. Wolf, K. H. Downing, Structure of the alpha beta tubulin dimer  
506 by electron crystallography. *Nature* **391**, 199-203 (1998).
- 507 6. E. Nogales, M. Whittaker, R. A. Milligan, K. H. Downing, High-resolution model  
508 of the microtubule. *Cell* **96**, 79-88 (1999).



- 509 7. B. Gigant *et al.*, The 4 A X-ray structure of a tubulin:stathmin-like domain  
510 complex. *Cell* **102**, 809-816 (2000).
- 511 8. L. Pecqueur *et al.*, A designed ankyrin repeat protein selected to bind to tubulin  
512 caps the microtubule plus end. *Proc Natl Acad Sci U S A* **109**, 12011-12016  
513 (2012).
- 514 9. A. E. Prota *et al.*, Structural Basis of Microtubule Stabilization by  
515 Discodermolide. *Chembiochem* **18**, 905-909 (2017).
- 516 10. E. H. Kellogg *et al.*, Insights into the Distinct Mechanisms of Action of Taxane  
517 and Non-Taxane Microtubule Stabilizers from Cryo-EM Structures. *J Mol Biol*  
518 **429**, 633-646 (2017).
- 519 11. F. A. Balaguer *et al.*, Crystal Structure of the Cyclostreptin-Tubulin Adduct:  
520 Implications for Tubulin Activation by Taxane-Site Ligands. *Int J Mol Sci* **20**,  
521 (2019).
- 522 12. A. E. Prota *et al.*, Molecular mechanism of action of microtubule-stabilizing  
523 anticancer agents. *Science* **339**, 587-590 (2013).
- 524 13. C. Trigili *et al.*, Structural Determinants of the Dictyostatin Chemotype for  
525 Tubulin Binding Affinity and Antitumor Activity Against Taxane- and  
526 Epothilone-Resistant Cancer Cells. *ACS Omega* **1**, 1192-1204 (2016).
- 527 14. A. E. Prota *et al.*, Structural basis of tubulin tyrosination by tubulin tyrosine ligase.  
528 *J Cell Biol* **200**, 259-270 (2013).
- 529 15. Y. Li, R. Edsall, Jr., P. G. Jagtap, D. G. Kingston, S. Bane, Equilibrium studies of  
530 a fluorescent paclitaxel derivative binding to microtubules. *Biochemistry* **39**, 616-  
531 623 (2000).
- 532 16. R. Matesanz *et al.*, Optimization of taxane binding to microtubules. Binding  
533 affinity decomposition and incremental construction of a high-affinity analogue  
534 of paclitaxel. *Chem Biol* **15**, 573-585 (2008).
- 535 17. Y.-T. Ma *et al.*, A Series of Enthalpically Optimized Docetaxel Analogues  
536 Exhibiting Enhanced Antitumor Activity and Water Solubility. *Journal of Natural*  
537 *Products* **81**, 524-533 (2018).
- 538 18. G. Samaranayake, K. A. Neidigh, D. G. I. Kingston, Modified Taxols, 8.  
539 Deacylation and Reacylation of Baccatin III. *Journal of Natural Products* **56**, 884-  
540 898 (1993).
- 541 19. J. Parness, D. G. I. Kingston, R. G. Powell, C. Harracksingh, S. B. Horwitz,  
542 Structure-activity study of cytotoxicity and microtubule assembly in vitro by taxol  
543 and related taxanes. *Biochemical and Biophysical Research Communications* **105**,  
544 1082-1089 (1982).
- 545 20. H. Lataste, V. Senilh, M. Wright, D. Guénard, P. Potier, Relationships between  
546 the structures of taxol and baccatine III derivatives and their in vitro action on the  
547 disassembly of mammalian brain and *Physarum* amoebal microtubules.  
548 *Proceedings of the National Academy of Sciences* **81**, 4090-4094 (1984).
- 549 21. D. G. Kingston, Recent advances in the chemistry of taxol. *J Nat Prod* **63**, 726-  
550 734 (2000).
- 551 22. J. M. Andreu, I. Barasoain, The interaction of baccatin III with the taxol binding  
552 site of microtubules determined by a homogeneous assay with fluorescent taxoid.  
553 *Biochemistry* **40**, 11975-11984 (2001).
- 554 23. R. M. Buey *et al.*, Microtubule interactions with chemically diverse stabilizing  
555 agents: Thermodynamics of binding to the paclitaxel site predicts cytotoxicity.  
556 *Chem. Biol.* **12**, 1269-1279 (2005).

- 557 24. A. Canales *et al.*, Molecular recognition of epothilones by microtubules and  
558 tubulin dimers revealed by biochemical and NMR approaches. *ACS Chem Biol* **9**,  
559 1033-1043 (2014).
- 560 25. A. Canales *et al.*, Insights into the interaction of discodermolide and docetaxel  
561 with dimeric tubulin. Mapping the binding sites of microtubule-stabilizing agents  
562 using an integrated NMR and computational approach. *ACS Chem. Biol.* **6**, 789-  
563 799 (2011).
- 564 26. R. M. Buey *et al.*, Interaction of Epothilone Analogs with the Paclitaxel Binding  
565 Site; Relationship between Binding Affinity, Microtubule Stabilization, and  
566 Cytotoxicity. *Chem Biol* **11**, 225-236 (2004).
- 567 27. G. E. Debs, M. Cha, X. Liu, A. R. Huehn, C. V. Sindelar, Dynamic and  
568 asymmetric fluctuations in the microtubule wall captured by high-resolution  
569 cryoelectron microscopy. *Proceedings of the National Academy of Sciences* **117**,  
570 16976-16984 (2020).
- 571 28. R. Zhang, B. LaFrance, E. Nogales, Separating the effects of nucleotide and EB  
572 binding on microtubule structure. *Proc. Natl. Acad. Sci. USA* **115**, E6191-E6200  
573 (2018).
- 574 29. Gregory M. Alushin *et al.*, High-Resolution Microtubule Structures Reveal the  
575 Structural Transitions in  $\alpha\beta$ -Tubulin upon GTP Hydrolysis. *Cell* **157**, 1117-1129  
576 (2014).
- 577 30. A. Rai *et al.*, Taxanes convert regions of perturbed microtubule growth into rescue  
578 sites. *Nature Materials* **19**, 355-365 (2020).
- 579 31. S. Kamimura, Y. Fujita, Y. Wada, T. Yagi, H. Iwamoto, X-ray fiber diffraction  
580 analysis shows dynamic changes in axial tubulin repeats in native microtubules  
581 depending on paclitaxel content, temperature and GTP-hydrolysis. *Cytoskeleton*  
582 **73**, 131-144 (2016).
- 583 32. J. Estevez-Gallego *et al.*, Structural model for differential cap maturation at  
584 growing microtubule ends. *Elife* **9**, (2020).
- 585 33. S. W. Manka, C. A. Moores, The role of tubulin-tubulin lattice contacts in the  
586 mechanism of microtubule dynamic instability. *Nat Struct Mol Biol* **25**, 607-615  
587 (2018).
- 588 34. L. A. Amos, J. Lowe, How Taxol stabilises microtubule structure. *Chem Biol* **6**,  
589 R65-69 (1999).
- 590 35. J. R. McIntosh *et al.*, Microtubules grow by the addition of bent guanosine  
591 triphosphate tubulin to the tips of curved protofilaments. *The Journal of Cell*  
592 *Biology* **217**, 2691 (2018).
- 593 36. A. Navarro-Vázquez, MSpin-RDC. A program for the use of residual dipolar  
594 couplings for structure elucidation of small molecules. *Magnetic Resonance in*  
595 *Chemistry* **50**, S73-S79 (2012).
- 596 37. C. Elie-Caille *et al.*, Straight GDP-tubulin protofilaments form in the presence of  
597 taxol. *Curr Biol* **17**, 1765-1770 (2007).
- 598 38. J. M. Andreu, in *Methods Mol. Biol.*, J. Zhou, Ed. (Humana Press Inc., Totowa,  
599 NJ, 2007), vol. 137, chap. Microtubule Protocols, pp. 17-28.
- 600 39. J. F. Diaz, R. Strobe, Y. Engelborghs, A. A. Souto, J. M. Andreu, Molecular  
601 recognition of taxol by microtubules. Kinetics and thermodynamics of binding of  
602 fluorescent taxol derivatives to an exposed site. *J Biol Chem* **275**, 26265-26276  
603 (2000).
- 604 40. G. Saez-Calvo *et al.*, Triazolopyrimidines Are Microtubule-Stabilizing Agents  
605 that Bind the Vinca Inhibitor Site of Tubulin. *Cell Chem Biol* **24**, 737-750 e736  
606 (2017).



- 607 41. P. A. Joe, A. Banerjee, R. F. Luduena, The roles of cys124 and ser239 in the  
608 functional properties of human betaIII tubulin. *Cell Motil Cytoskeleton* **65**, 476-  
609 486 (2008).
- 610 42. D. W. Shen *et al.*, Multiple drug-resistant human KB carcinoma cells  
611 independently selected for high-level resistance to colchicine, adriamycin, or  
612 vinblastine show changes in expression of specific proteins. *Journal of Biological*  
613 *Chemistry* **261**, 7762-7770 (1986).
- 614 43. Y. Yang *et al.*, H6, a novel hederagenin derivative, reverses multidrug resistance  
615 in vitro and in vivo. *Toxicology and Applied Pharmacology* **341**, 98-105 (2018).
- 616 44. W. Kabsch, XDS. *Acta Crystallogr. Sect. D* **66**, 125-132 (2010).
- 617 45. P. D. Adams *et al.*, PHENIX: a Comprehensive Python-based System for  
618 Macromolecular Structure Solution. *Acta Crystallogr. Sect. D* **66**, 213-221  
619 (2010).
- 620 46. P. Emsley, B. Lohkamp, W. G. Scott, K. Cowtan, Features and development of  
621 Coot. *Acta Crystallogr D Biol Crystallogr* **66**, 486-501 (2010).
- 622 47. Y. Tang *et al.*, Modification of C-seco taxoids through ring tethering and  
623 substituent replacement leading to effective agents against tumor drug resistance  
624 mediated by betaIII-Tubulin and P-glycoprotein (P-gp) overexpressions. *Eur J*  
625 *Med Chem* **137**, 488-503 (2017).
- 626

## 627 Acknowledgments

628 We thank Ganadería Fernando Díaz for calf brains supply and staff of beamlines  
629 X06DA of the Swiss Light Source (Paul Scherrer Institut, Villigen PSI, Switzerland) and  
630 BL11-NDC-SWEET (ALBA, Cerdanyola del Vallès, Spain) for their support. We also  
631 thank Mr. Pedro Gascón Blanco for his private donation to the project to support a month  
632 of a student salary.

633 This article is dedicated to the memory of Dr. Linda Amos, a dear friend and  
634 pioneer in the study of microtubules and the mechanism of action of Taxol(34), who  
635 passed away while we were assembling this manuscript.

636 **Funding:** Ministerio de Ciencia e Innovación PID2019-104545RB-I00 (J.F.D.); CSIC  
637 PIE 201920E111 (J.F.D.); CSIC PIE 202020E301(J.F.D.); Fondo de Investigaciones  
638 Sanitarias COV20/01007 (J.F.D.); EU H2020-MSCA-ITN-2019 860070 TUBINTRAIN  
639 (J.F.D. , A.E.P.); Swiss National Science Foundation (31003A\_166608) (M.O.S.) ; JSPS  
640 KAKENHI (16K07328/17H03668) to (S.K.); NSFC Grant No. 30930108 (W-S. F.);  
641 CAMS Innovation Fund for Medical Sciences 2016-I2M-1-010 (W-S. F.)

642 **Author contributions:** Conceptualization: A.E.P., W-S.F., M.O.S. and J.F.D. ;  
643 Investigation: A.E.P., K.B., T.M., N.O., D.L-A., M.A.O., F.J-P., K.G., J.F.G.A. C.R.,

644 J.F.D., A.C. J. E-G., S.K., Y.M. and S.L.; Visualization: A.E.P. and M.A.O. Writing—  
645 original draft: J.F.D. Writing—review & editing: A.E.P., W-S.F., M.O.S., J.M.A. and K-  
646 H.A.

647 **Competing interests:** Authors declare that they have no competing interests.

648 **Data and materials availability:** All raw data non presented in the manuscript are  
649 available upon reasobable request from the authors. Cell biology, biochemistry, fiber  
650 diffraction and NMR data requests should be addressed to J.F.D. Crystallographic data  
651 requests should be addressed to A.E.P.

652 **Figures and Tables**

653

654 **Table 1.** IC<sub>50</sub><sup>1</sup> values (μM) of tested compounds in Ptx sensitive KB (HeLa), HeLa S3  
655 and in Ptx resistant KBV (HeLa) P-gp overexpressing and HeLa βIII-tubulin  
656 overexpressing cells.

657

| Compound         | KB μM           | KBV μM | HeLa S3 μM      | HeLa βIII μM  |
|------------------|-----------------|--------|-----------------|---------------|
| <b>2a</b>        | 0.6±0.1         | >20    | 11.5±0.8        | 11.8±0.3      |
| <b>2b</b>        | 10±3            | >20    | 17.7±0.6        | 16.6±0.3      |
| <b>2c</b>        | 13±1            | >20    | 12.9±0.8        | >20           |
| <b>2d</b>        | >20             | >20    | >20             | >20           |
| Ptx <sup>2</sup> | 0.0019 ± 0.0001 | 9± 4   | 0.0011 ± 0.0004 | 0.034 ± 0.009 |

658

659 <sup>1</sup>IC<sub>50</sub> values of growth inhibition in a panel of HeLa (KB and HeLa S3) cervical  
660 carcinoma cells expressing P-glycoprotein (KBV) or the βIII isotype of tubulin (HeLa  
661 βIII), compared to the isogenic parental lines. Values are presented as the mean±SE of  
662 three independent measurements<sup>2</sup>. Data from reference(47).

663

664

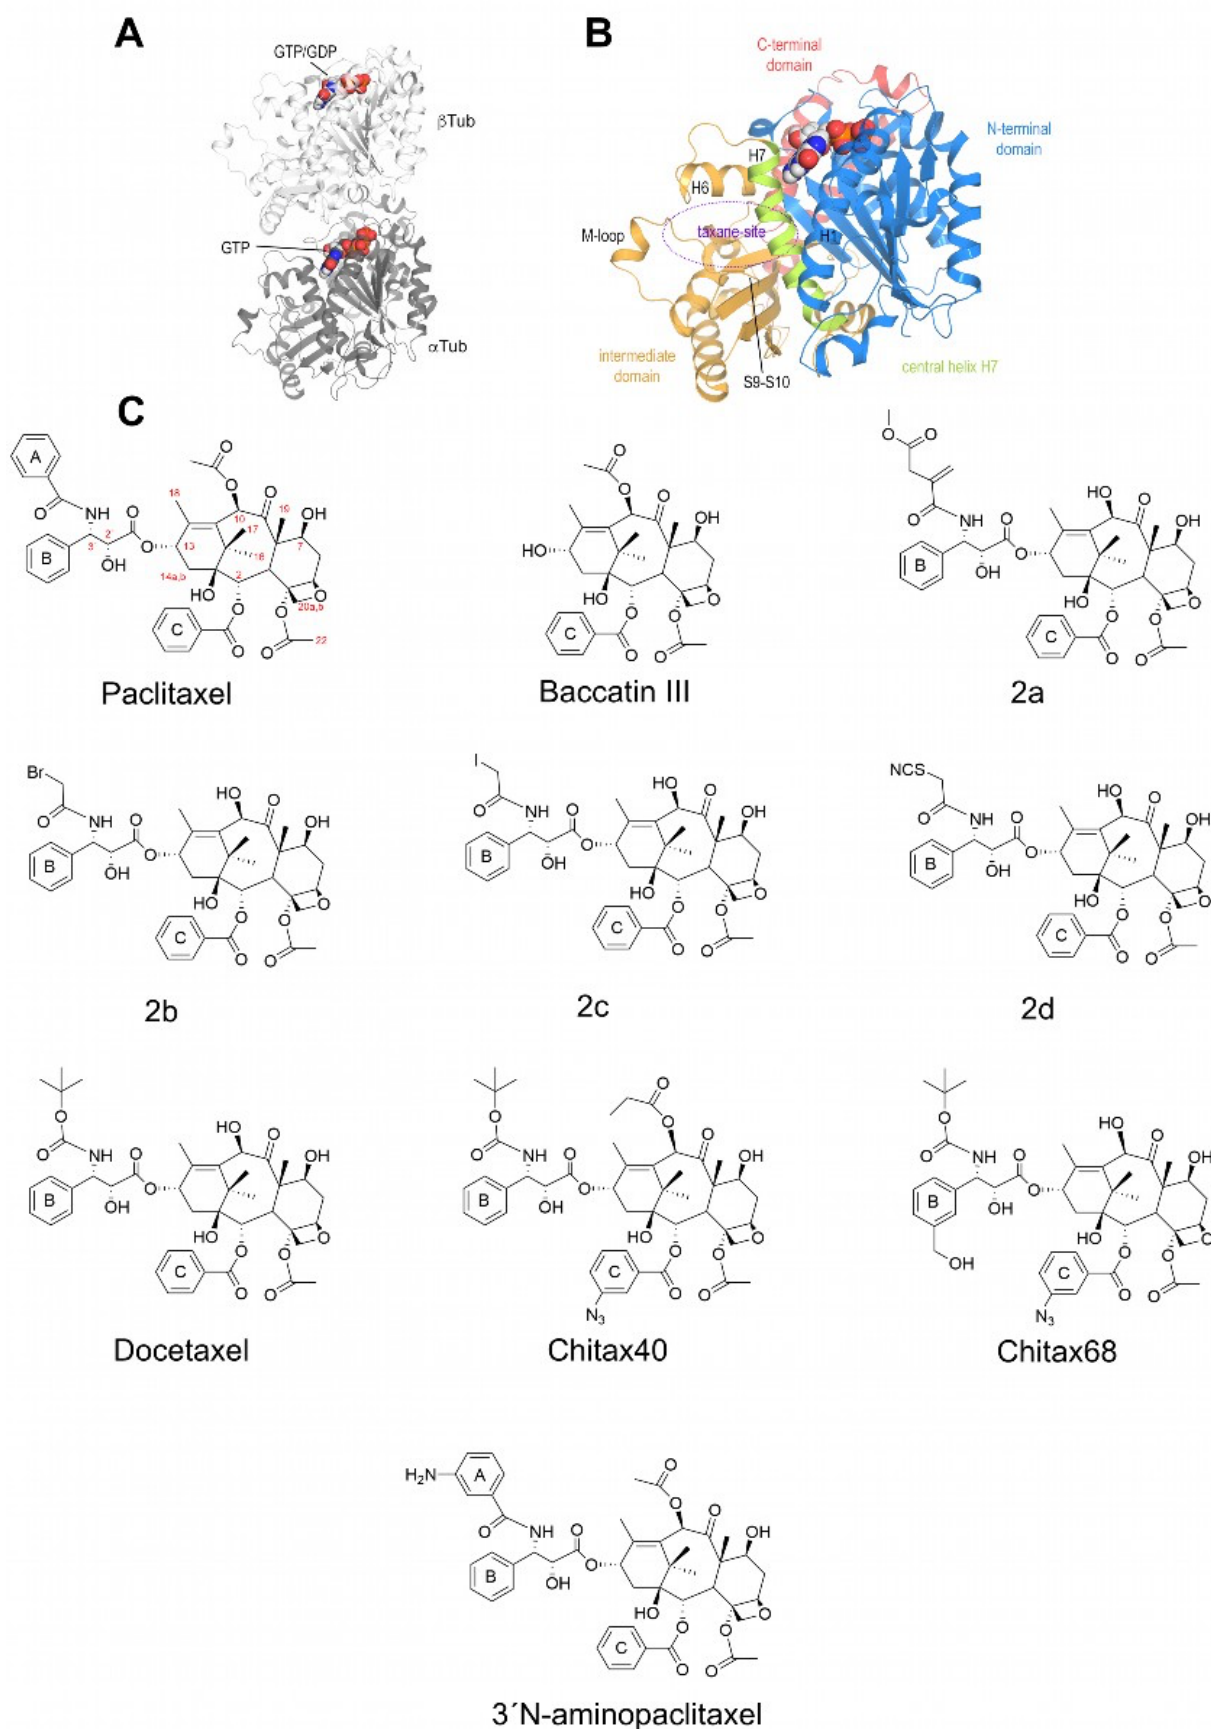

665

666 **Figure 1.** (A, B) Structural features of tubulin. (C) Structures of taxanes used in this

667 study.



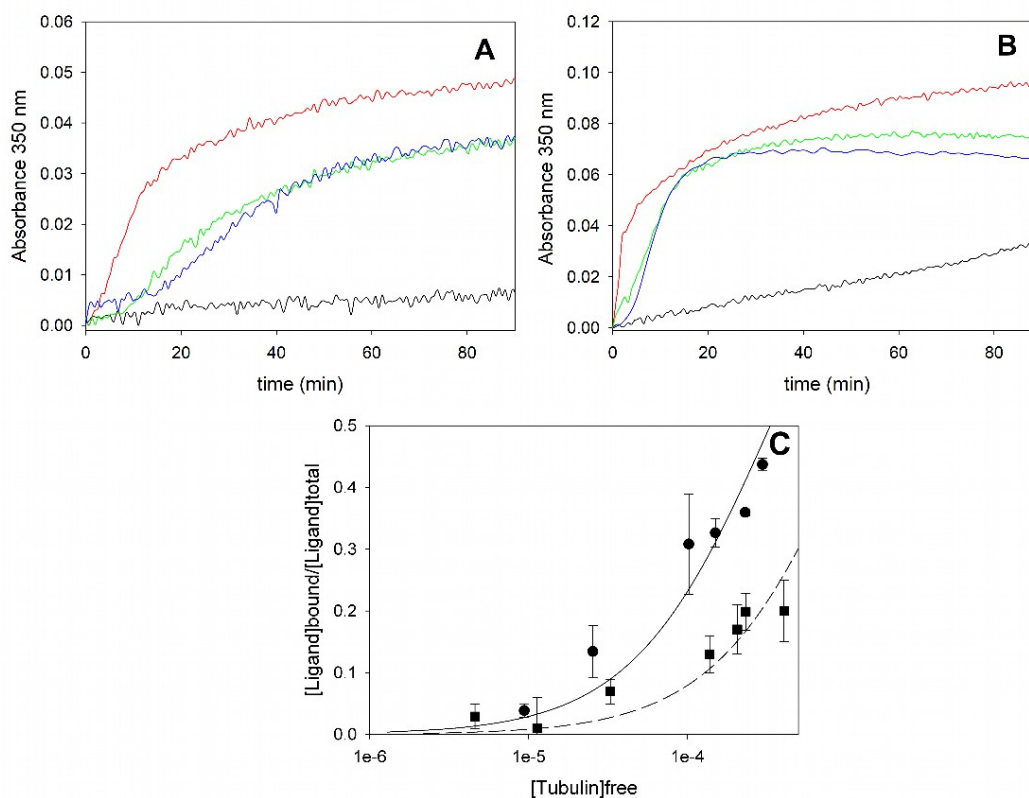

679

680 **Figure 3. Biochemical characterization of the tubulin-2a and 2b interaction.** Time-  
681 course assembly of 25 μM tubulin in 10 mM phosphate buffer, 1 mM EDTA, 1 mM GTP,  
682 pH 6.7, with 4 (A) or 7 mM (B) MgCl<sub>2</sub> in the presence of 27.5 μM Ptx (red), **2a** (green),  
683 **2b** (blue) or vehicle (DMSO, black). (C) Isotherm of binding of 50 μM baccatin III  
684 (circles and solid line) or **2a** (squares and dashed line) to tubulin. Error bars are standard  
685 errors of three independent measurements. Lines are the fitting to a single site model.

686

687

688

689



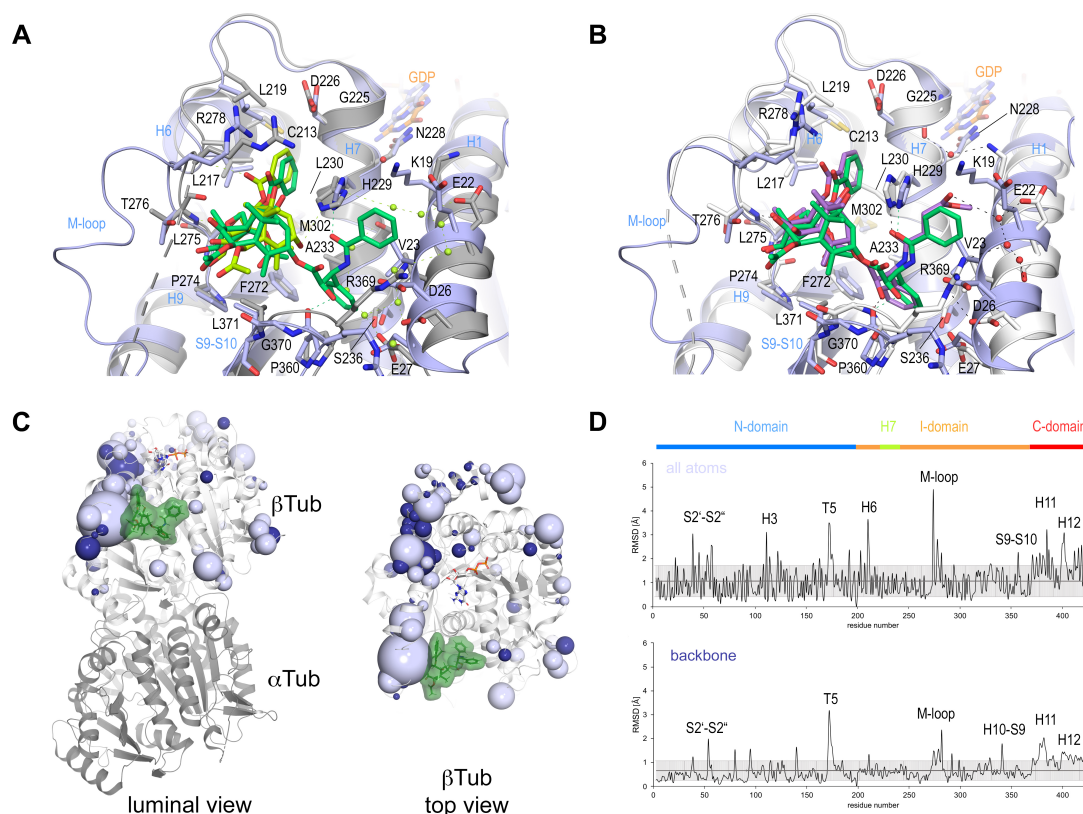

690

691 **Figure 4. Comparison of taxane binding to unassembled c- vs. assembled, s-tubulin.**

692 (A) Close-up view of the superimposed baccatin III bound (ligand in lemon; protein in grey ribbon and sticks) to unassembled, c-tubulin and Ptx bound to assembled, s-tubulin  
 693 as found in a MT (PDB ID 6WVR; ligand in dark green; protein in slate ribbon and sticks)  
 694 structures. Interacting residues of tubulin are shown in stick representation and are  
 695 labeled. Oxygen and nitrogen atoms are colored red and blue, respectively. Hydrogen  
 696 bonds are depicted as black dashed lines. Secondary structural elements of tubulin are  
 697 labeled in blue. Water molecules belonging to the baccatin III structure are represented  
 698 as lemon spheres. The structures were superimposed onto their taxane-sites (residues  
 699 208–219 + 225–237 + 272–276 + 286–296 + 318–320 + 359–376; rmsd 0.894 Å (52 C<sub>α</sub>  
 700 atoms). (B) Close-up view of superimposed **2a** bound to unassembled tubulin (ligand in  
 701 violet; protein in grey ribbon and sticks) and Ptx bound to assembled tubulin (PDB ID  
 702 6WVR; ligand in dark green; protein in slate ribbon and sticks) structures (rmsd 0.826 Å  
 703 (52 C<sub>α</sub> atoms) using the same settings as in (A). (C) Perturbations on β-tubulin induced  
 704 by Ptx upon binding to assembled tubulin in MTs (PDB ID 6WVR). The α-tubulin and  
 705 β-tubulin chains are in ribbon representation and are colored in dark and light grey,  
 706 respectively. The rmsd differences between unbound and Ptx-bound, assembled MTs are  
 707 represented as light (all atom rmsd) and dark (backbone rmsd) blue spheres. Only the  
 708 rmsd-differences above a threshold of average ± standard deviation are displayed. The  
 709 sphere-radii correspond to the average-subtracted rmsd-values displayed in panel (D). (D)  
 710 rmsd plots of all atoms (top) and backbone (bottom) positions between the Ptx bound  
 711 (PDB ID 6WVR) and the apo (PDB ID 6DPV) assembled tubulin state in MTs. The grey  
 712 error bar represents the average rmsd ± standard deviation. The top bar is colored  
 713 according to the following domain assignment: N-domain (marine blue), I-domain  
 714 (orange), central helix βH7 (lemon) and C-domain (red). The β-tubulin chains of the  
 715 corresponding structures were superimposed onto their β-tubulin N-terminal β-sheets  
 716 (rmsd 0.304 Å 30 C<sub>α</sub>).

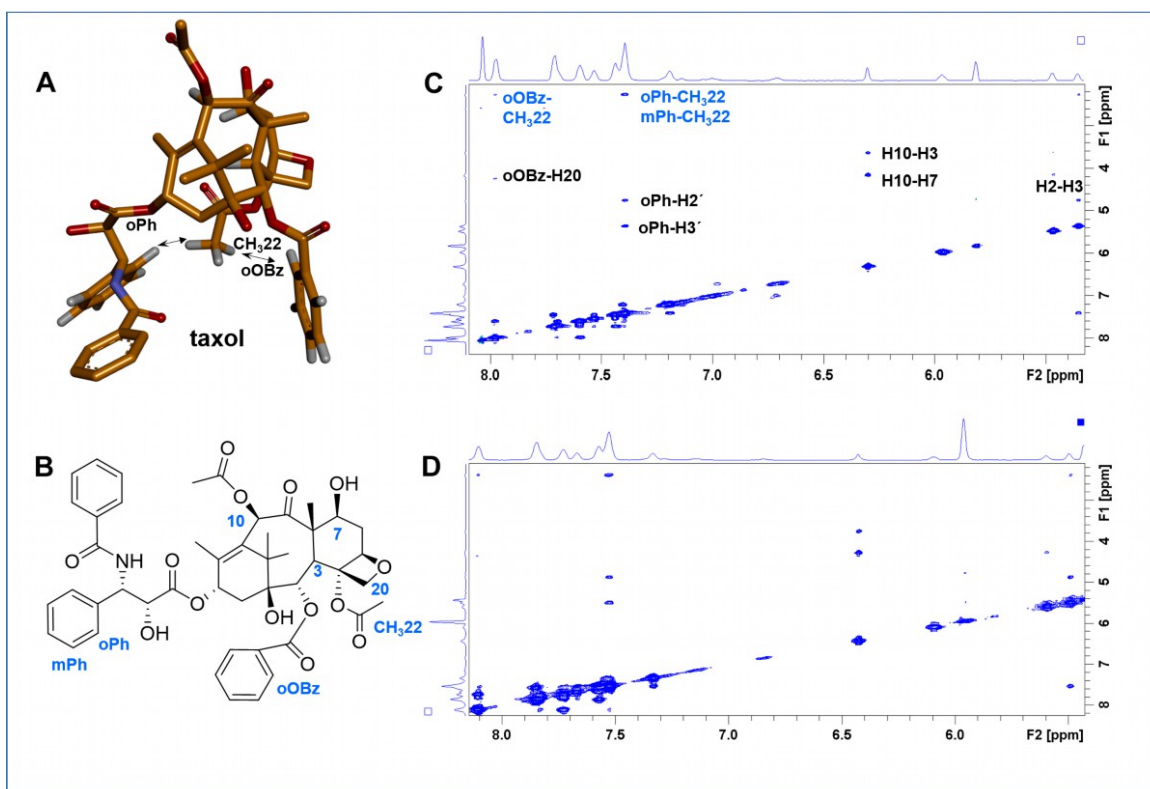

718

719 **Figure 5. NMR-TR-NOESY characterization of the Ptx-tubulin interaction. (A)**

720 **Bioactive structure of Ptx as determined by TR-NOESY. (B) Chemical structure of Ptx,**

721 **indicating the protons involved in the TR-NOESY detected interactions. (C) TR-NOESY**

722 **spectra (298 K) of Ptx bound to tubulin dimers. (D) TR-NOESY spectra (310 K) of Ptx**

723 **bound to MTs.**

724

725

726

727



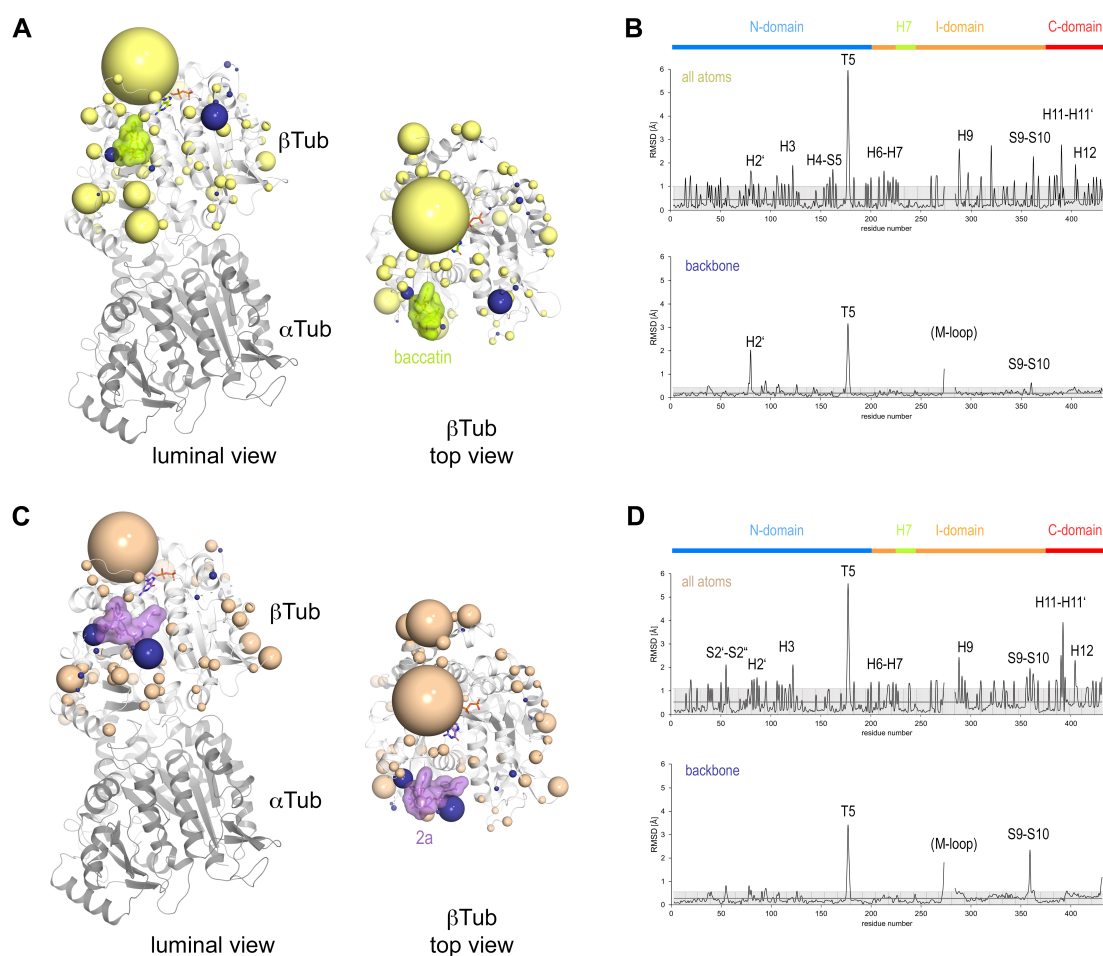

728

729 **Figure 6. Perturbations induced by taxane binding to unassembled, c-tubulin. (A)**

730 Perturbations on all residue (yellow) and backbone atoms (dark blue) of the  $\beta$ -tubulin  
 731 chain induced by baccatin III upon binding to unassembled tubulin. The tubulin chains  
 732 are in ribbon representation and are colored in dark ( $\alpha$ -tubulin) and light ( $\beta$ -tubulin) grey,  
 733 respectively. The rmsd-values of the superimposed unbound and baccatin III bound,  
 734 unassembled tubulin are represented as pale yellow (all atom rmsd) and dark blue  
 735 (backbone rmsd) spheres, respectively. Only the rmsd-values above a threshold of  
 736 average + standard deviation are displayed. The sphere-radii correspond to the average-  
 737 subtracted rmsd-values displayed in panel (B). (B) rmsd plots of the all atoms (top) and  
 738 backbone (bottom) positions between the baccatin bound and the apo (PDB ID 4I55)  
 739 unassembled tubulin state. The grey error bar represents the average rmsd  $\pm$  standard  
 740 deviation. The top bar is colored according to the following domain assignment: N-  
 741 domain (marine blue), I-domain (orange), central helix H7 (lemon), C-domain (red). The  
 742  $\beta$ -tubulin chains of the corresponding structures were superimposed onto their  $\beta$ -tubulin  
 743 N-terminal  $\beta$ -sheet (rmsd 0.08 Å of 29 C $\alpha$ ). (C) Perturbations on all residue (wheat) and  
 744 backbone atoms (dark blue) of the  $\beta$ -tubulin chain induced by **2a** upon binding to  
 745 unassembled tubulin. (D) rmsd plots of the all atoms (top) and backbone (bottom)  
 746 positions between the **2a** bound and the apo (PDB ID 4I55) unassembled tubulin state  
 747 (rmsd 0.10 Å of 29 C $\alpha$ ). The same display settings as in (B) are applied.

748

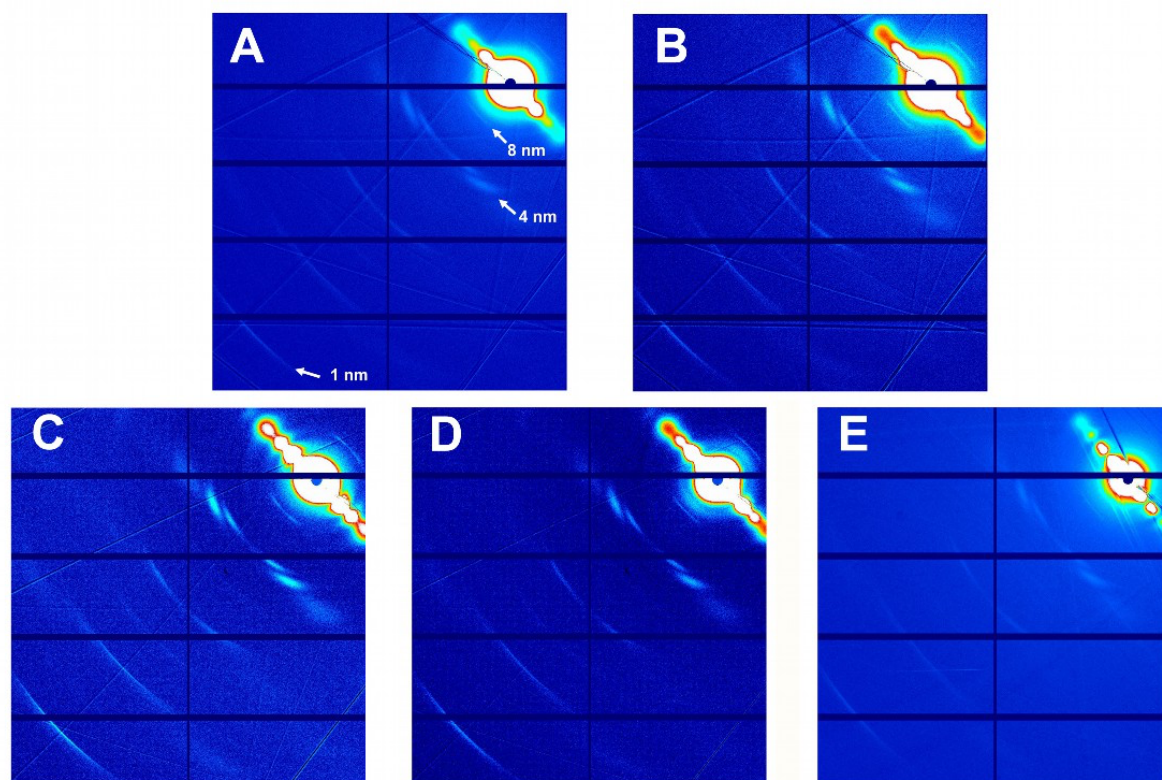

749 **Figure 7. Fiber diffraction patterns of MTs assembled from (A) GTP-tubulin and Ptx,**  
750 **(B) GTP-tubulin and Dtx, (C) GTP-tubulin and 2a, (D) GTP-tubulin and 2b, and (E)**  
751 **GTP-tubulin and baccatin III.**

752

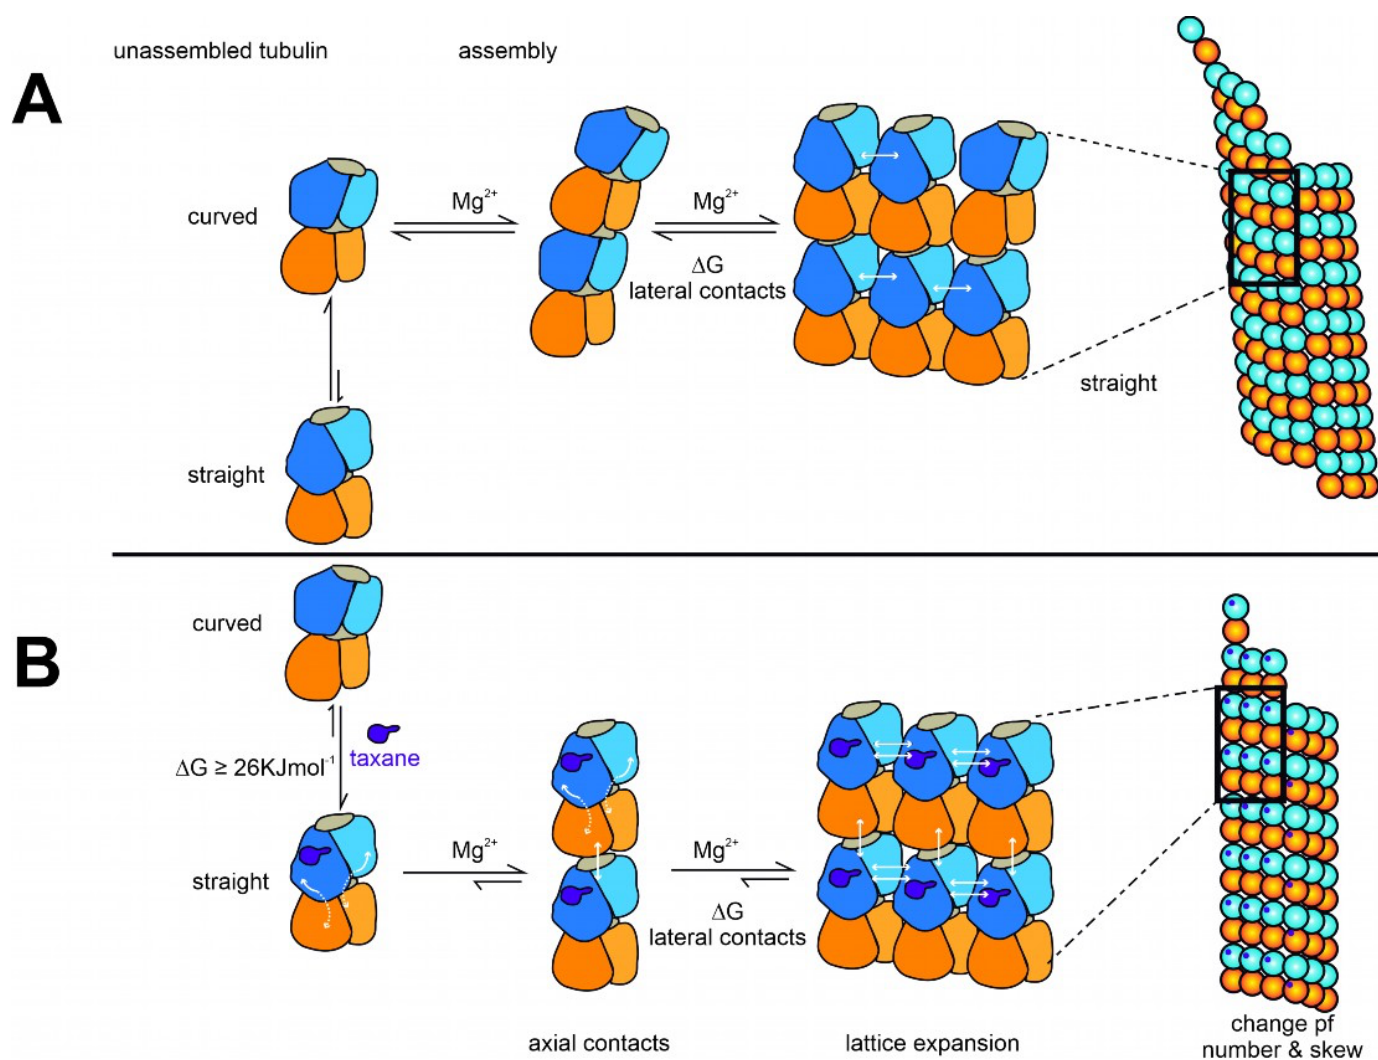

753

754 **Figure 8. Schematic representation of the mechanism of taxane-induced MT**  
 755 **assembly. (A)** MT assembly scheme with a classical bidimensional nucleus for  
 756 cooperative polymerization. **(B)** Taxane-induced MT assembly scheme with an activated,  
 757 s-tubulin for cooperative polymerization. In both panels,  $\alpha$ -Tubulin is in orange (Nt-  
 758 domain light orange and, intermediate domain dark orange),  $\beta$ -tubulin is in blue  
 759 (Nt-domain light blue and, intermediate domain dark blue), while the nucleotide binding  
 760 site in tubulin is in gray. Taxane molecules in (B) are depicted in purple. White arrows  
 761 show direct and allosteric protein-protein interactions.

762



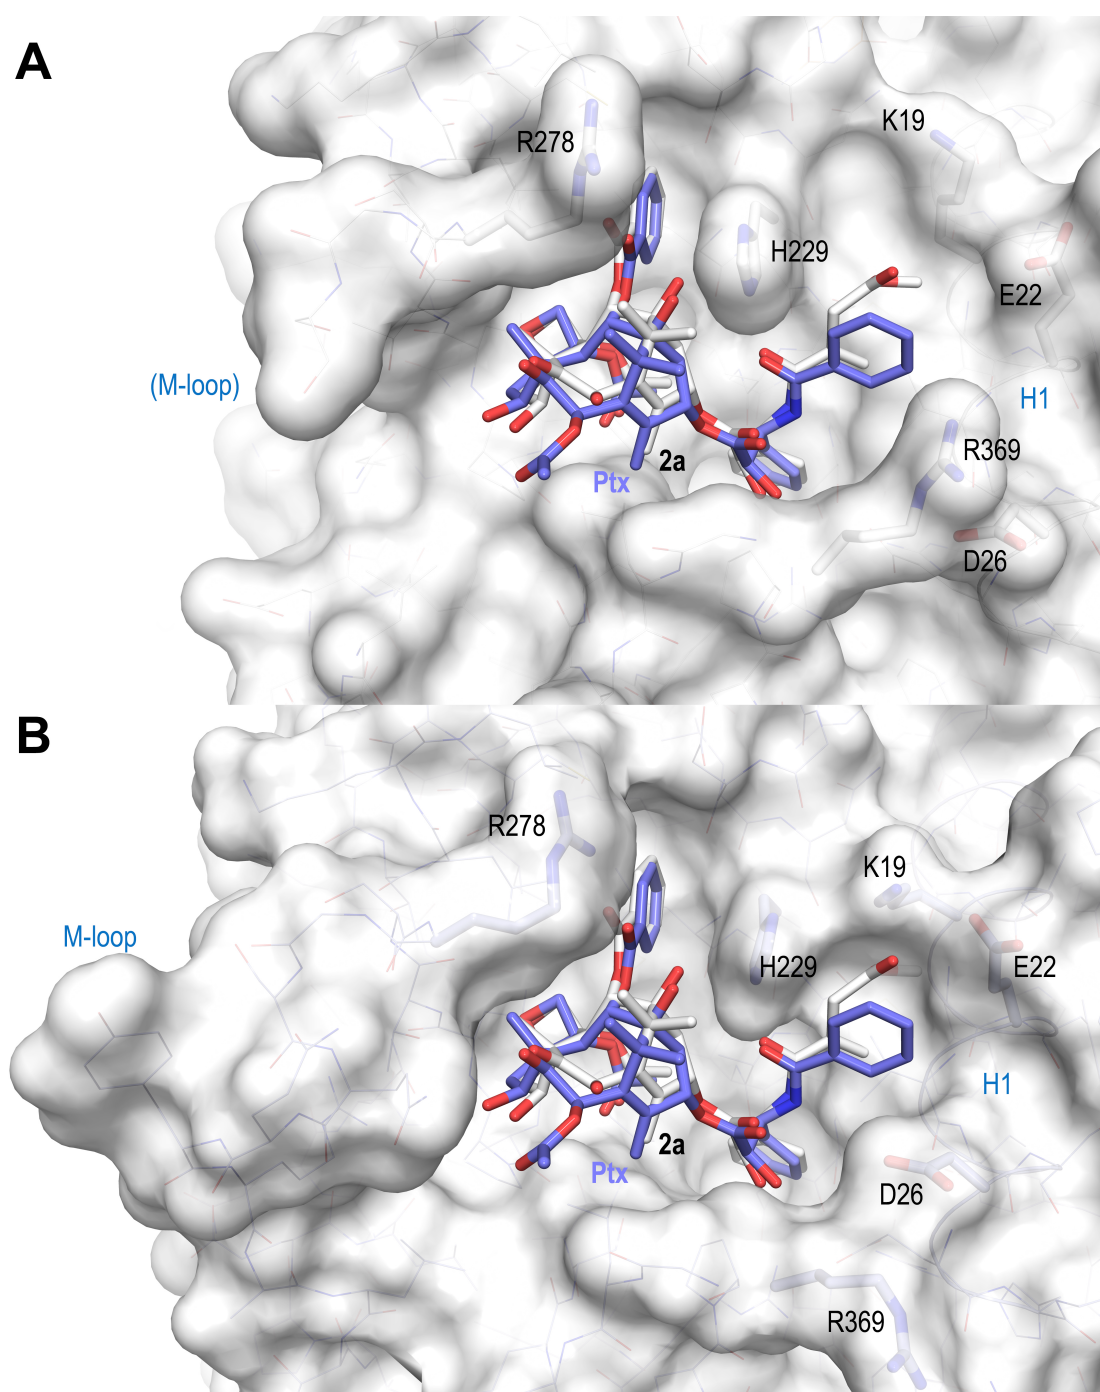

763

764

765

766

767

768

769

770

**Figure 9. Surface representations of liganded taxane sites in both (A) the c- and (B) s-tubulin conformational state.** The structures of **2a** (white) and **Ptx** (slate) bound to MTs (PDB ID 6WVR) were superimposed onto their central helices  $\beta$ H7. The side chains of the  $\beta$ M-loop residue  $\beta$ R278 and of residues surrounding the C13 side chains of the ligands are in stick representation and are labeled. Helix  $\beta$ H1 is highlighted in ribbon representation
